# Supplementary material
Source: publisher figshare collection journal article supplement (https://acs.figshare.com/ndownloader/files/13112999)
Supplement: Supplementary file 1 [file 13112999]

# Combining Desorption Electrospray Ionization Mass Spectrometry Imaging and Machine Learning for Molecular Recognition of Myocardial Infarction

Katherine Margulis<sup>a</sup>, Zhenpeng Zhou<sup>a</sup>, Qizhi Fang<sup>b</sup>, Richard E. Sievers<sup>b</sup>, Randall J. Lee<sup>b</sup>,  
Richard N. Zare<sup>a,1</sup>

<sup>a</sup>Department of Chemistry, Stanford University, Stanford, CA, 94305;

<sup>b</sup>Cardiovascular Research Institute, University of California San Francisco, San Francisco, CA, 94131

<sup>1</sup>To whom correspondence should be addressed. Email: zare@stanford.edu

## Table of Contents

**1. Table S1** Mass spectral peaks identified by GBDT algorithm as important for classification of each pixel as infarct or normally perfused myocardium arranged in descending order of relative importance.

**2. Table S2.** Performance of various classification algorithms on mass spectrometry imaging data collected during this study.

**Table S1.** Mass spectral peaks identified by GBDT algorithm as important for classification of each pixel as infarct or normally perfused myocardium arranged in descending order of relative importance.

|    | <i>m/z</i> | Importance | Mean difference | Prevalence |
|----|------------|------------|-----------------|------------|
| 1  | 124        | 0.05547    | -0.09989        | Normal     |
| 2  | 79.95      | 0.04841    | -0.04163        | Normal     |
| 3  | 253.2      | 0.04740    | 0.05119         | Infarct    |
| 4  | 327.25     | 0.04286    | -0.31952        | Normal     |
| 5  | 281.25     | 0.04186    | 0.20391         | Infarct    |
| 6  | 282.25     | 0.03732    | 0.03581         | Infarct    |
| 7  | 309.3      | 0.03580    | -0.02105        | Normal     |
| 8  | 113        | 0.03379    | -0.01115        | Normal     |
| 9  | 451.3      | 0.03328    | -0.02117        | Normal     |
| 10 | 303.25     | 0.03177    | -0.08824        | Normal     |
| 11 | 790.55     | 0.03127    | -0.02869        | Normal     |
| 12 | 311.15     | 0.02774    | 0.03276         | Infarct    |
| 13 | 329.25     | 0.02774    | -0.10815        | Normal     |
| 14 | 284.25     | 0.02521    | 0.02315         | Infarct    |
| 15 | 283.25     | 0.02370    | 0.11689         | Infarct    |
| 16 | 299.2      | 0.02370    | 0.00579         | Infarct    |
| 17 | 304.25     | 0.02269    | -0.02325        | Normal     |
| 18 | 89         | 0.02219    | -0.09220        | Normal     |
| 19 | 328.25     | 0.02219    | -0.07940        | Normal     |
| 20 | 255.25     | 0.02068    | 0.15295         | Infarct    |
| 21 | 331.25     | 0.02017    | -0.02731        | Normal     |
| 22 | 307.25     | 0.01967    | -0.01667        | Normal     |
| 23 | 326.2      | 0.01916    | 0.00722         | Infarct    |
| 24 | 427.3      | 0.01866    | 0.00025         | Infarct    |
| 25 | 227.2      | 0.01866    | 0.02028         | Infarct    |
| 26 | 183        | 0.01866    | 0.01805         | Infarct    |
| 27 | 297.25     | 0.01715    | -0.00763        | Normal     |
| 28 | 277.2      | 0.01664    | -0.01323        | Normal     |
| 29 | 453.3      | 0.01563    | -0.00872        | Normal     |
| 30 | 280.25     | 0.01563    | -0.08472        | Normal     |
| 31 | 325.2      | 0.01563    | 0.04097         | Infarct    |

|    | <i>m/z</i> | Importance | Mean difference | Prevalence |
|----|------------|------------|-----------------|------------|
| 32 | 339.2      | 0.01513    | 0.02309         | Infarct    |
| 33 | 256.25     | 0.01462    | 0.02220         | Infarct    |
| 34 | 885.55     | 0.01362    | -0.01307        | Normal     |
| 35 | 115        | 0.01311    | -0.08855        | Normal     |
| 36 | 279.25     | 0.01261    | -0.42116        | Normal     |
| 37 | 305.25     | 0.01160    | -0.04656        | Normal     |
| 38 | 312.15     | 0.00908    | 0.00549         | Infarct    |
| 39 | 197        | 0.00807    | 0.00008         | Infarct    |
| 40 | 273.8      | 0.00656    | 0.03454         | Infarct    |
| 41 | 297.15     | 0.00656    | 0.00804         | Infarct    |
| 42 | 295.25     | 0.00454    | -0.01265        | Normal     |
| 43 | 747.5      | 0.00454    | -0.01956        | Normal     |
| 44 | 340.2      | 0.00353    | 0.00327         | Infarct    |
| 45 | 114        | 0.00303    | -0.01410        | Normal     |
| 46 | 330.25     | 0.00303    | -0.02568        | Normal     |
| 47 | 452.3      | 0.00252    | 0.00002         | Infarct    |
| 48 | 301.2      | 0.00252    | -0.01129        | Normal     |
| 49 | 117.05     | 0.00252    | -0.00303        | Normal     |
| 50 | 146.95     | 0.00252    | 0.07572         | Infarct    |
| 51 | 459.35     | 0.00151    | 0.00020         | Infarct    |
| 52 | 189.05     | 0.00151    | -0.00235        | Normal     |
| 53 | 205.15     | 0.00101    | 0.03261         | Infarct    |
| 54 | 311.3      | 0.00101    | 0.00010         | Infarct    |
| 55 | 332.25     | 0.00101    | 0.00098         | Infarct    |
| 56 | 228.95     | 0.00050    | 0.00266         | Infarct    |
| 57 | 455.3      | 0.00050    | 0.00019         | Infarct    |
| 58 | 254.2      | 0.00050    | 0.00324         | Infarct    |
| 59 | 102.95     | 0.00050    | -0.00012        | Normal     |
| 60 | 499.3      | 0.00050    | -0.00461        | Normal     |
| 61 | 130        | 0.00050    | 0.01312         | Infarct    |
| 62 | 196.9      | 0.00050    | 0.00513         | Infarct    |

**Table S2.** Performance of various classification algorithms on mass spectrometry imaging data collected during this study.

| %         | GBDT         | PCA+LDA    | SVM        | Logistic Regression | RMMC       | RF         |
|-----------|--------------|------------|------------|---------------------|------------|------------|
| Accuracy  | 97.43 ± 0.45 | 94.33±0.65 | 93.92±0.89 | 94.86±0.78          | 95.63±0.73 | 96.57±0.63 |
| Recall    | 95.82 ± 1.46 | 91.32±1.84 | 88.07±2.27 | 89.45±1.20          | 90.92±1.98 | 94.03±0.72 |
| Precision | 94.84 ± 0.96 | 94.01±1.05 | 91.74±1.12 | 93.50±1.86          | 94.64±1.61 | 94.82±2.20 |
